# Supplementary material for: Efficacy and safety of mavacamten in treatment of hypertrophic cardiomyopathy: a systematic review and meta-analysis
Source: PubMed Central journal article supplement (PMC10518811; doi:10.2144/fsoa-2023-0059), 2023-09-19
Supplement: fsoa-09-898-s2.pdf [file fsoa-09-898-s2.pdf]

**Supplemental Table 2. Cochrane Risk of Bias Assessment**

|                           | <b>Cochrane Risk-of-Bias Tool</b>                         |              |                                                                                                                                                                                            |
|---------------------------|-----------------------------------------------------------|--------------|--------------------------------------------------------------------------------------------------------------------------------------------------------------------------------------------|
|                           | Bias                                                      | Risk of bias | Author judgement                                                                                                                                                                           |
| <b>EXPLORER-HCM TRIAL</b> | Random sequence generation (selection bias)               | Low Risk     | Patients were randomly assigned (1:1) via an interactive response system to receive once daily orally administered treatment with mavacamten (starting dose 5 mg) or placebo for 30 weeks. |
|                           | Allocation concealment (selection bias)                   | Low Risk     | Patients were randomly allocated via an interactive response system with sufficient masking taking place. Drug containers were of identical appearance.                                    |
|                           | Blinding of participants and personnel (performance bias) | Low Risk     | Participants and Investigators were blinded and the outcome is not likely to be influenced by the blinding.                                                                                |
|                           | Blinding of outcome assessment (detection bias)           | Low Risk     | Outcome is not likely to be influenced by the blinding.                                                                                                                                    |
|                           | Incomplete outcome data (attrition bias)                  | Low Risk     | No missing outcome data observed.                                                                                                                                                          |
|                           | Selective reporting (reporting bias)                      | Low Risk     | All pre-specified endpoints were reported.                                                                                                                                                 |
|                           | Other bias                                                | Low Risk     | The study appears to be free of other sources of bias.                                                                                                                                     |
| <b>VALOR-HCM TRIAL</b>    | Random sequence generation (selection bias)               | Unclear Risk | Insufficient information to assess whether an important risk of bias exist.                                                                                                                |

| <b>Cochrane Risk-of-Bias Tool</b>                         |                                             |                                                                                                                            |                                                                                                                            |
|-----------------------------------------------------------|---------------------------------------------|----------------------------------------------------------------------------------------------------------------------------|----------------------------------------------------------------------------------------------------------------------------|
| Bias                                                      | Risk of bias                                | Author judgement                                                                                                           |                                                                                                                            |
| Allocation concealment (selection bias)                   | Unclear Risk                                | Insufficient information to assess whether an important risk of bias exists. Method of concealment has not been described. |                                                                                                                            |
| Blinding of participants and personnel (performance bias) | Low Risk                                    | Investigators were blinded and the outcome is not likely to be influenced by the blinding.                                 |                                                                                                                            |
| Blinding of outcome assessment (detection bias)           | Low Risk                                    | Statistical analyses were performed by an independent statistician.                                                        |                                                                                                                            |
| Incomplete outcome data (attrition bias)                  | Low Risk                                    | No missing outcome data observed.                                                                                          |                                                                                                                            |
| Selective reporting (reporting bias)                      | Low Risk                                    | All pre-specified endpoints were reported.                                                                                 |                                                                                                                            |
| Other bias                                                | Low Risk                                    | The study appears to be free of other sources of bias.                                                                     |                                                                                                                            |
| <b>MAVERICK TRIAL</b>                                     | Random sequence generation (selection bias) | Unclear Risk                                                                                                               | Insufficient information to assess whether an important risk of bias exist                                                 |
|                                                           | Allocation concealment (selection bias)     | Unclear Risk                                                                                                               | Insufficient information to assess whether an important risk of bias exists. Method of concealment has not been described. |

| <b>Cochrane Risk-of-Bias Tool</b>                         |              |                                                                                            |
|-----------------------------------------------------------|--------------|--------------------------------------------------------------------------------------------|
| Bias                                                      | Risk of bias | Author judgement                                                                           |
| Blinding of participants and personnel (performance bias) | Low Risk     | Investigators were blinded and the outcome is not likely to be influenced by the blinding. |
| Blinding of outcome assessment (detection bias)           | Low Risk     | Outcome is not likely to be influenced by the blinding.                                    |
| Incomplete outcome data (attrition bias)                  | Low Risk     | No missing outcome data observed.                                                          |
| Selective reporting (reporting bias)                      | Low Risk     | All pre-specified endpoints were reported.                                                 |
| Other bias                                                | Low Risk     | The study appears to be free of other sources of bias.                                     |
